# Supplementary material for: A Clustering Study of Dietary Patterns and Physical Activity among Workers of the Uruguayan State Electrical Company
Source: MDPI journal article supplement (doi:10.3390/nu16020304), 2024-01-19
Supplement: s1 [file s1]

**Table S1.** Principal component analysis of dietary patterns, physical activity, characteristics of the job and characteristics of the subject for workers in the IN-UTE study.

| Variables                                 | Energy-dense food DP | Characteristics of the job | Mediterranean-like DP | Subject's characteristics |
|-------------------------------------------|----------------------|----------------------------|-----------------------|---------------------------|
| Meat products                             | 0.688                |                            |                       |                           |
| Cereals                                   | 0.646                |                            |                       |                           |
| Ultra-processed (salted and sugar)        | 0.64                 |                            |                       |                           |
| Beef meat                                 | 0.584                |                            |                       |                           |
| Fruit nectars and soft drinks (sweetener) | 0.552                |                            |                       |                           |
| Milk and dairy products                   | 0.435                |                            | 0.25                  |                           |
| Beverages                                 | 0.331                |                            |                       | 0.299                     |
| Cumulative risk factors                   |                      | 0.923                      |                       |                           |
| Work outside the apartment                |                      | 0.737                      |                       |                           |
| 24-hour on-call duty                      |                      | 0.702                      |                       |                           |
| Vegetables                                |                      |                            | 0.686                 |                           |
| Fruits                                    |                      |                            | 0.675                 |                           |
| Legumes and Nuts                          |                      |                            | 0.488                 |                           |
| Water                                     |                      |                            | 0.435                 | 0.237                     |
| Oils and fats                             | 0.334                |                            | 0.374                 |                           |
| Vigorous physical activity                |                      |                            | 0.318                 | 0.681                     |
| Moderate physical activity                |                      |                            | 0.258                 | 0.565                     |
| Age                                       |                      |                            | 0.213                 | -0.559                    |
| Body mass index                           |                      |                            |                       | -0.47                     |
| Eggs                                      | 0.213                |                            | 0.3                   | 0.419                     |
| Percentage of variance                    | 12.862               | 10.979                     | 9.521                 | 7.325                     |
| Cumulative percentage of variance         | 12.862               | 23.841                     | 33.363                | 40.688                    |

Principal component analysis was used to maximize the information gained for the predominant food groups from diet. This mathematical model calculates new variables (principal components) that account for the variability in the food groups data and enables the study of covariances or correlations between variables (e.g., milk and dairy products, cereals, vegetables, meat and meat products, etc.). The combination of food group variables with the greatest amount of variability is the first principal component. The subsequent components (second and third principal components) describe the maximum amount of remaining variability. Factor loading was used to interpret the factor structure. Loadings are equivalent to Pearson correlation coefficients, and a higher loading indicates a stronger relation between a factor and an observed variable. Strong loading was defined as a value  $\geq 0.6$ , and marginal loading as a value from 0.2 to 0.4.
